# Supplementary material
Source: HighWire-hosted journal article supplement (https://jnis.bmj.com/highwire/filestream/172286/field_highwire_adjunct_files/0/neurintsurg-2022-019008supp001_data_supplement.pdf)

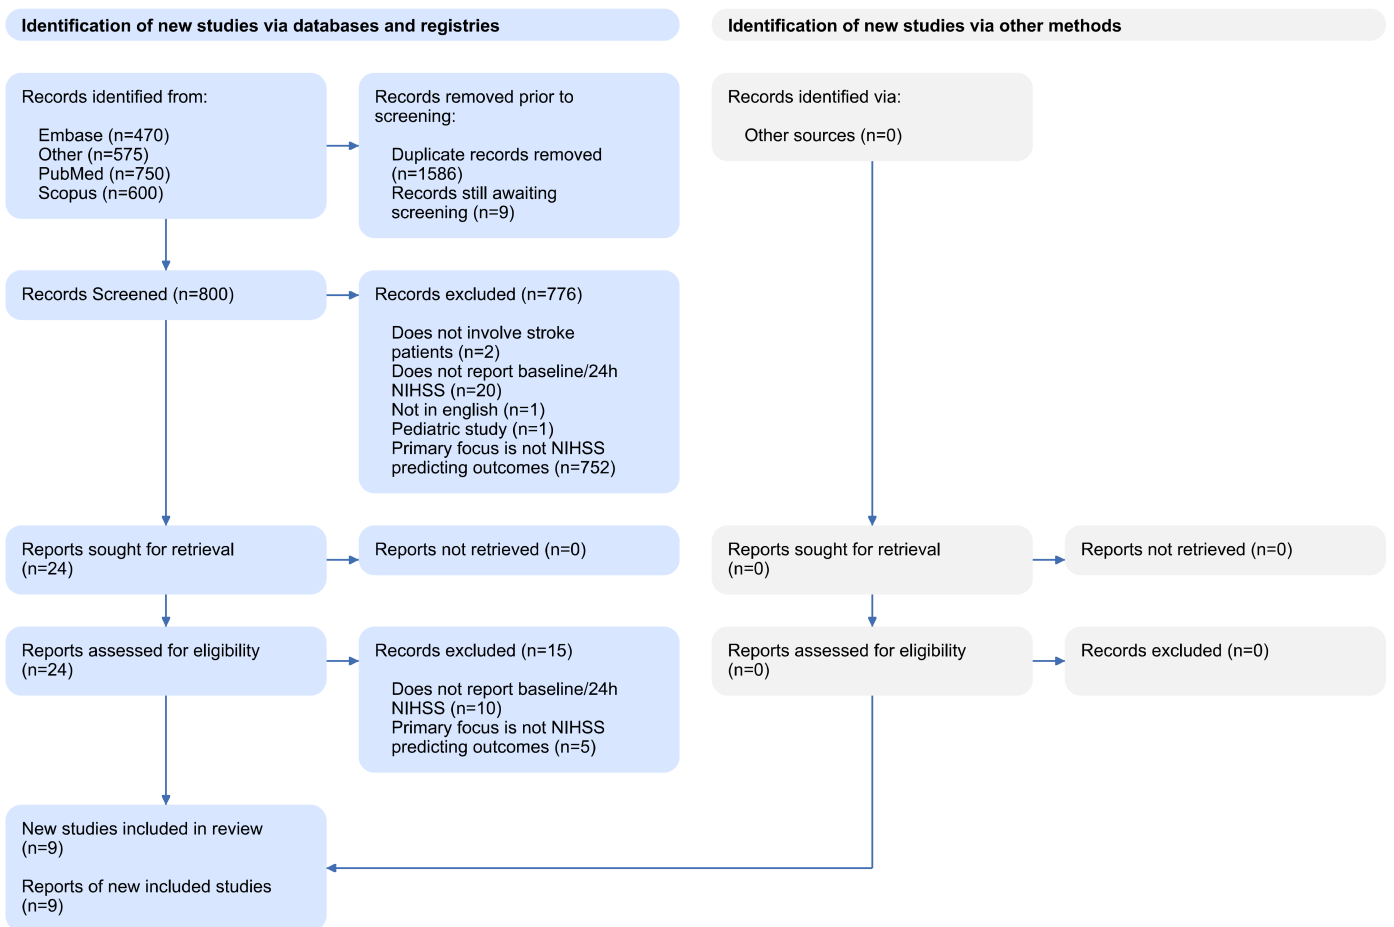

Supplement: neurintsurg-2022-019008supp001_data_supplement.pdf [file neurintsurg-2022-019008supp001_data_supplement.pdf]
